# Supplementary material for: Resection of Low-Grade Gliomas in the Face Area of the Primary Motor Cortex and Neurological Outcome
Source: MDPI journal article supplement (doi:10.3390/cancers15030781), 2023-01-27
Supplement: s1 [file s1]

**Table S1.** Extent of resection and histology (n=12)

| <b>Patient No.</b> | <b>histology</b>              | <b>Extent of resection</b> |
|--------------------|-------------------------------|----------------------------|
| 1                  | oligodendroglioma WHO grade 2 | STR                        |
| 2                  | oligodendroglioma WHO grade 2 | GTR                        |
| 3                  | oligodendroglioma WHO grade 2 | STR                        |
| 4                  | astrozytoma WHO grade 2       | STR                        |
| 5                  | astrozytoma WHO grade 2       | GTR                        |
| 6                  | astrozytoma WHO grade 2       | STR                        |
| 7                  | oligodendroglioma WHO grade 2 | STR                        |
| 8                  | astrozytoma WHO grade 2       | GTR                        |
| 9                  | astrozytoma WHO grade 2       | GTR                        |
| 10                 | oligodendroglioma WHO grade 2 | STR                        |
| 11                 | astrozytoma WHO grade 2       | GTR                        |
| 12                 | oligodendroglioma WHO grade 2 | STR                        |

GTR=gross total resection

STR=subtotal resection
